# Supplementary material for: Getting the details right: optical, dielectric, and vibrational outcomes of structural phase transition in one-dimensional pyrrolidinium lead iodide and the role of defects
Source: Royal Society of Chemistry journal article supplement (doi:10.1039/d2tc01523d), 2022-01-01
Supplement: d2tc01523d1.pdf [file d2tc01523d1.pdf]

Electronic Supplementary Information for

**Getting the details right: optical, dielectric, and vibrational outcomes of structural phase transition  
in one-dimensional pyrrolidinium lead iodide and the role of defects**

Katarzyna Fedoruk<sup>1</sup>, Szymon J. Zelewski<sup>2,3</sup>, Jan K. Zaręba<sup>4</sup>, Maciej Ptak<sup>5</sup>, Mirosław Mączka<sup>5</sup>, Adam Sieradzki<sup>1</sup>

<sup>1</sup>Department of Experimental Physics, Faculty of Fundamental Problems of Technology, Wrocław University of Science and Technology, Wybrzeże Wyspiańskiego 27, 50-370 Wrocław, Poland

<sup>2</sup>Department of Semiconductor Materials Engineering, Faculty of Fundamental Problems of Technology, Wrocław University of Science and Technology, Wybrzeże Wyspiańskiego 27, 50-370 Wrocław, Poland

<sup>3</sup>Cavendish Laboratory, JJ Thomson Avenue, University of Cambridge, Cambridge CB3 0HE, United Kingdom

<sup>4</sup>Advanced Materials Engineering and Modelling Group, Faculty of Chemistry, Wrocław University of Science and Technology, 50-370 Wrocław, Poland

<sup>5</sup>Institute of Low Temperature and Structure Research, Polish Academy of Sciences, 50-422 Wrocław, Poland

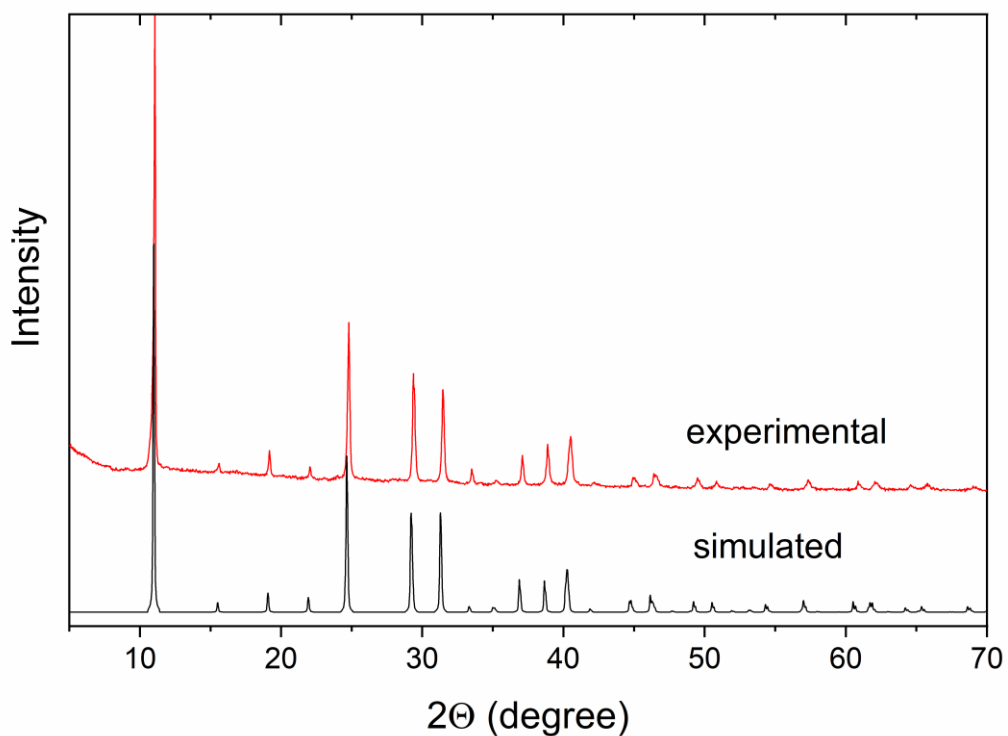

**Figure S1.** Comparison of powder XRD pattern of PyrPbI<sub>3</sub> with the calculated one based on the room-temperature single-crystal data reported previously.

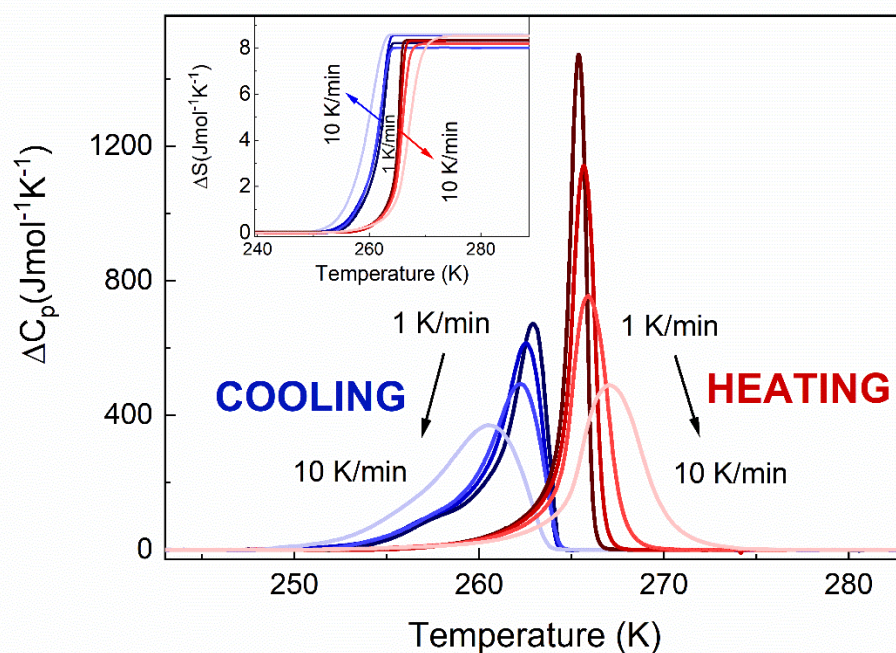

**Figure S2.** Temperature dependence of excess heat capacity,  $\Delta C_p$ , obtained for heating and cooling cycles of PyrPbI<sub>3</sub> with the rates equal 1, 2, 5, and 10 K min<sup>-1</sup>. The inset shows the corresponding change of entropy,  $\Delta S$ , measured in the same conditions.

Table S1. Tentative assignments of Raman bands at 80 and 300 K.

| LT phase, 80 K<br>( $\text{cm}^{-1}$ ) | HT phase, 300 K<br>( $\text{cm}^{-1}$ ) | Assignment                            |
|----------------------------------------|-----------------------------------------|---------------------------------------|
| 3119w                                  | 3185sh                                  | $\nu_{\text{as}}\text{NH}_2$          |
| 3065w                                  | 3080vw                                  | $\nu_{\text{s}}\text{NH}_2$           |
| 3001s, 2983s, 2960s, 2955sh, 2935s,    | 3004m, 2981s, 2964s, 2952sh, 2931s      | $\nu_{\text{as}}\text{CH}_2$          |
| 2900m, 2883sh, 2878m                   | 2898m, 2887m, 2874m                     | $\nu_{\text{s}}\text{CH}_2$           |
| 1550m                                  | 1560w                                   | $\delta\text{NH}_2$                   |
| 1473w, 1452sh, 1447m                   | 1468w, 1452sh, 1445m                    | $\delta\text{CH}_2$                   |
| 1369w, 1353m                           | 1353w                                   | $\omega\text{NH}_2$                   |
| 1324vw, 1306w, 1285w                   | 1308w                                   | $\omega\text{CH}_2+\omega\text{NH}_2$ |
| 1235m                                  | 1228w                                   | $\tau\text{CH}_2$                     |
| 1196                                   | 1199w                                   | $\tau\text{NH}_2$                     |
| 1051m, 1016w, 977w, 905m               | 1046w, 1011w, 982vw, 905m               | $\rho\text{CH}_2+\nu(\text{ring})$    |
| 868m                                   | 863m                                    | $\rho\text{NH}_2$                     |
| 570w                                   | 567w                                    | $\delta(\text{ring})_{\text{ip}}$     |
| 274m                                   | 272w                                    | $\delta(\text{ring})_{\text{op}}$     |
| 133vs, 102m                            | 140sh, 105vs                            | $\nu\text{PbI}_6+\delta\text{PbI}_6$  |

Key:  $\nu$ , stretching;  $\nu_{\text{s}}$ , symmetric stretching;  $\nu_{\text{as}}$ , antisymmetric stretching;  $\delta$ , bending;  $\omega$ , wagging;  $\tau$ , twisting;  $\rho$ , rocking; ip, in-plane; op, out-of-plane; vs, very strong; s, strong; m, medium; w, weak; vw, very weak; sh, shoulder.

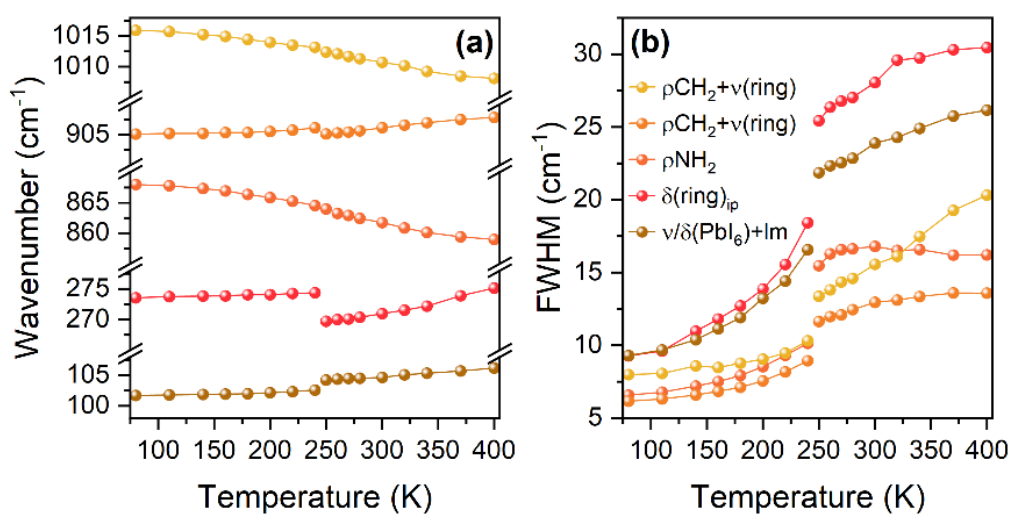

Figure S3. Temperature dependence of energy and broadening (FWHM values) for selected Raman bands.

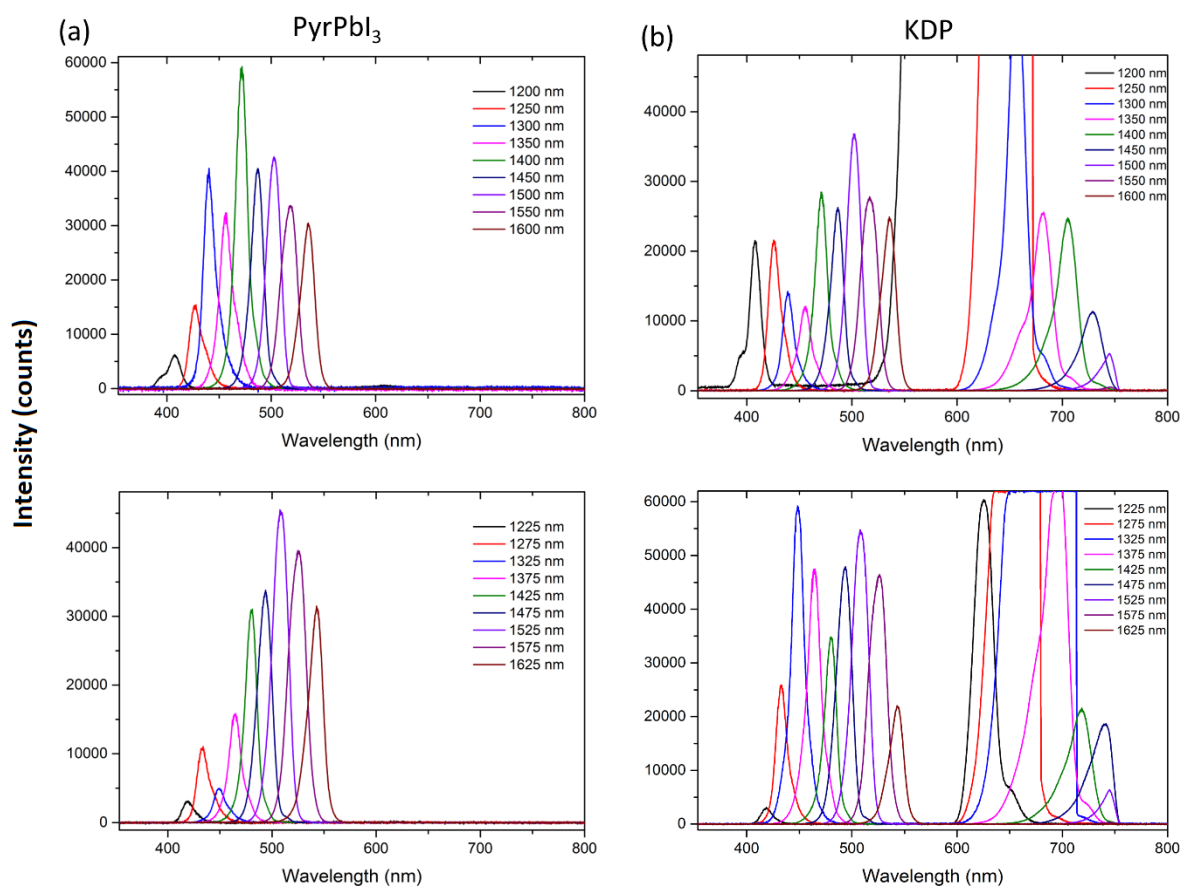

**Figure S4.** Experimental spectra of nonlinear emissions obtained upon irradiation with femtosecond laser pulses from 1200 nm to 1625 nm of (a) PyrPbI<sub>3</sub> and (b) KDP. Spectra have been divided into two subsets to improve clarity. It is shown that for PyrPbI<sub>3</sub> only THG response is registered, confirming its centrosymmetry, whereas KDP shows simultaneously THG and SHG responses. Note that the spectra have been measured for various collection times ranging from 40 ms to 5000 ms, and are not normalised to the same collection time in this plot. T = 293 K.

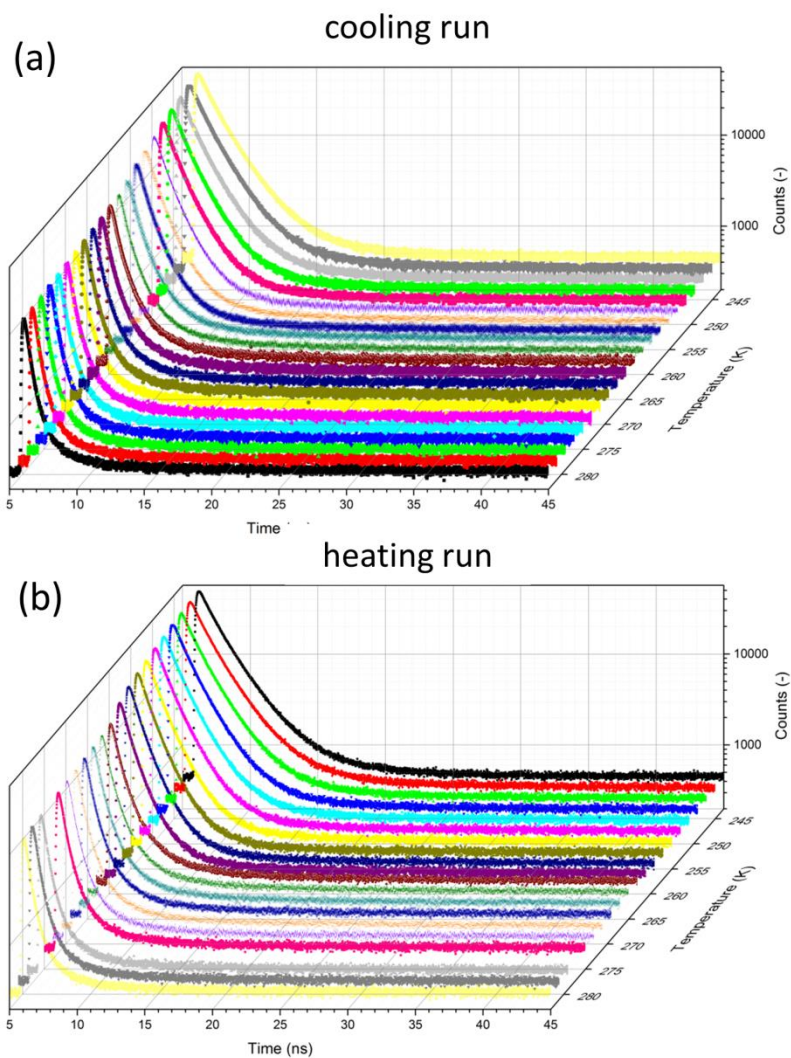

**Figure S5.** Luminescence decay curves for (a) cooling (283 K – 243 K) and (b) heating (243 K – 283 K) run.  $\lambda_{\text{ex}} = 375 \text{ nm}$ ,  $\lambda_{\text{em}} = 660 \text{ nm}$ .

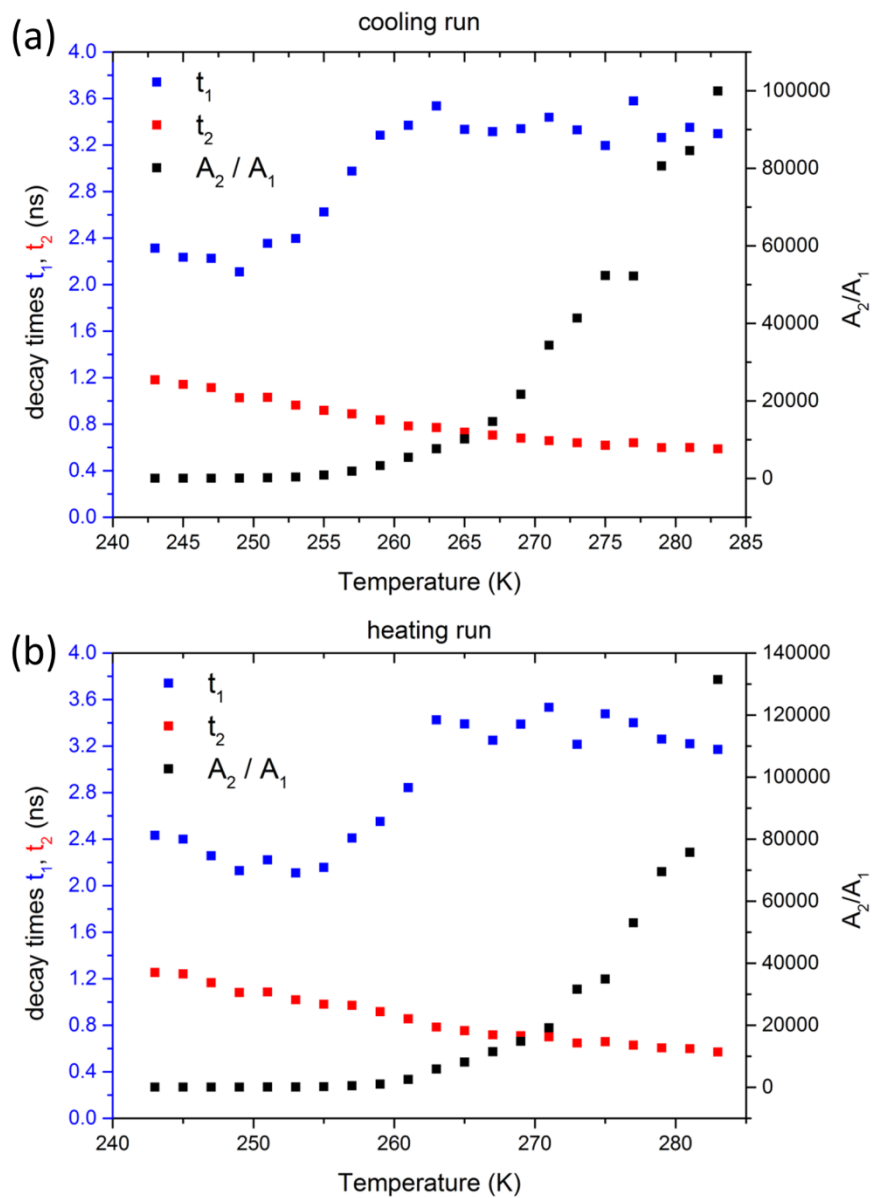

**Figure S6.** Temperature plots of luminescence decay time components  $\tau_1$  and  $\tau_2$  and corresponding weight ratios ( $A_2/A_1$ ) for (a) cooling (283 K – 243 K) and (b) heating (243 K – 283 K) run.  $\lambda_{\text{ex}} = 375$  nm,  $\lambda_{\text{em}} = 660$  nm.
